# Supplementary material for: In Vivo Biomarker Analysis of the Effects of Intranasally Dosed PC945, a Novel Antifungal Triazole, on Aspergillus fumigatus Infection in Immunocompromised Mice
Source: PubMed Central journal article supplement (PMC5571324; doi:10.1128/aac.00124-17), 2017-08-24
Supplement: AAC.00124-17_zac009176452s1.pdf [file AAC.00124-17_zac009176452s1.pdf]

**Supplement Table 1** Effects of Early and Late intervention by PC945 on fungal load (CFU) in lung and galactomannan concentrations in BALF and serum in *Aspergillus fumigatus* infected, immuno-compromised, neutropenic mice

| Treatment Regimen  | N | Dose $\mu\text{g}/\text{mouse}$ [mg/kg] | Values (% inhibition of response) |                      |                      |
|--------------------|---|-----------------------------------------|-----------------------------------|----------------------|----------------------|
|                    |   |                                         | CFU (mg of lung)                  | GM in BALF (COI)     | GM in serum (COI)    |
| Vehicle + Conidia  | 5 | None                                    | 28.4 $\pm$ 16.9                   | 4.8 $\pm$ 0.40       | 5.3 $\pm$ 1.1        |
| Early Intervention | 6 | 2.8 [0.14]                              | 15.2 $\pm$ 13.7 (46)              | 0.70 $\pm$ 0.39 (85) | 0.81 $\pm$ 0.52 (85) |
|                    | 6 | 14 [0.70]                               | 2.1 $\pm$ 1.6 (93)                | 0.37 $\pm$ 0.46 (92) | 0.24 $\pm$ 0.18 (95) |
|                    | 6 | 70 [3.5]                                | 0.8 $\pm$ 0.7 (97)                | 0.13 $\pm$ 0.02 (97) | 0.18 $\pm$ 0.07 (97) |
| Late Intervention  | 6 | 14 [0.70]                               | 3.8 $\pm$ 1.0 (87)                | 0.24 $\pm$ 0.06 (95) | 0.29 $\pm$ 0.11 (95) |
|                    | 6 | 70 [3.5]                                | 1.9 $\pm$ 1.7 (93)                | 0.22 $\pm$ 0.14 (95) | 0.25 $\pm$ 0.19 (95) |
|                    | 6 | 350 [17.5]                              | 0.5 $\pm$ 0.3 (98)                | 0.11 $\pm$ 0.05 (98) | 0.24 $\pm$ 0.11 (95) |

BALF=bronchoalveolar lavage fluid; CFU=colony forming units; COI: cut-off index which was calculated by the formula: Cut-off index=OD in sample / OD in cut-off control provided in kit; GM=galactomannan; N=number.

Data for fungal load and GM are shown as the mean  $\pm$  standard error (SD); N=5–6.

Percentage inhibition with respect to vehicle (shown in brackets).

**Supplement Table 2** Effects of Early and Late intervention by PC945 on macrophage and neutrophil accumulation into the BALF, IFN $\gamma$ , IL-17 and MDA levels in the BALF and IL-6 and TNF $\alpha$  levels in the serum of *Aspergillus fumigatus* infected, immuno-compromised, neutropenic mice

| Treatment Regimen  | N | Dose $\mu\text{g}/\text{mouse}$ [mg/kg] | Cell numbers in BAL $\times 10^5/\text{mL}$ (% inhibition) |                      | Biomarkers in BALF (% Inhibition) |                    |                                 | Biomarkers in serum (% Inhibition) |                      |
|--------------------|---|-----------------------------------------|------------------------------------------------------------|----------------------|-----------------------------------|--------------------|---------------------------------|------------------------------------|----------------------|
|                    |   |                                         | Macrophage                                                 | Neutrophil           | IFN $\gamma$ (pg/mL)              | IL-17 (pg/mL)      | MDA ( $\mu\text{g}/\text{mL}$ ) | IL-6 (pg/mL)                       | TNF $\alpha$ (pg/mL) |
| Vehicle + Conidia  | 5 | None                                    | 0.65 $\pm$ 0.14                                            | 0.49 $\pm$ 0.09      | 9.2 $\pm$ 1.0                     | 19.8 $\pm$ 3.6     | 1.8 $\pm$ 0.2                   | 284 $\pm$ 112                      | 25.6 $\pm$ 8.0       |
|                    | 6 | 2.8 [0.14]                              | 0.40 $\pm$ 0.15 (38)                                       | 0.37 $\pm$ 0.04 (24) | 3.7 $\pm$ 1.7 (60)                | 9.8 $\pm$ 5.3 (51) | 0.96 $\pm$ 0.32 (47)            | 159 $\pm$ 73.3 (44)                | 11.8 $\pm$ 5.9 (54)  |
|                    | 6 | 14 [0.70]                               | 0.32 $\pm$ 0.07 (51)                                       | 0.26 $\pm$ 0.12 (47) | 3.0 $\pm$ 0.8 (67)                | 6.7 $\pm$ 4.9 (66) | 0.57 $\pm$ 0.22 (68)            | 86.3 $\pm$ 46.9 (70)               | 7.3 $\pm$ 3.5 (71)   |
| Early Intervention | 6 | 70 [3.5]                                | 0.26 $\pm$ 0.05 (60)                                       | 0.22 $\pm$ 0.04 (55) | 2.5 $\pm$ 0.3 (73)                | 3.2 $\pm$ 0.8 (84) | 0.34 $\pm$ 0.05 (81)            | 44.5 $\pm$ 12.2 (84)               | 4.7 $\pm$ 0.4 (82)   |
|                    | 6 | 14 [0.70]                               | 0.43 $\pm$ 0.05 (34)                                       | 0.38 $\pm$ 0.04 (22) | 4.3 $\pm$ 2.2 (53)                | 8.5 $\pm$ 2.9 (57) | 0.45 $\pm$ 0.10 (75)            | 51.7 $\pm$ 16.8 (82)               | 6.2 $\pm$ 0.5 (76)   |
|                    | 6 | 70 [3.5]                                | 0.40 $\pm$ 0.11 (38)                                       | 0.34 $\pm$ 0.05 (31) | 3.3 $\pm$ 0.8 (64)                | 4.0 $\pm$ 0.8 (80) | 0.37 $\pm$ 0.10 (79)            | 44.2 $\pm$ 11.4 (84)               | 5.5 $\pm$ 0.7 (79)   |
| Late Intervention  | 6 | 350 [17.5]                              | 0.32 $\pm$ 0.07 (51)                                       | 0.27 $\pm$ 0.08 (45) | 2.1 $\pm$ 0.3 (77)                | 2.9 $\pm$ 0.7 (85) | 0.25 $\pm$ 0.05 (86)            | 35.9 $\pm$ 10.4 (87)               | 4.9 $\pm$ 0.6 (81)   |

BALF=bronchoalveolar lavage fluid; IFN $\gamma$ =interferon gamma; IL-17=interleukin 17; MDA=malondialdehyde.N=number. The data are shown as the mean  $\pm$  standard error (SD); N=5–6. Percentage inhibition with respect to vehicle.

**Supplement Table 3** Effects of Early and/or Late intervention by posaconazole or voriconazole on fungal load (CFU) in lung and galactomannan concentrations in BALF and serum in *Aspergillus fumigatus* infected, immuno-compromised, neutropenic mice

| Treatment Regimen  | N | Dose $\mu\text{g}/\text{mouse}$<br>[mg/kg] | Values (% inhibition of response) |                        |                        |
|--------------------|---|--------------------------------------------|-----------------------------------|------------------------|------------------------|
|                    |   |                                            | CFU<br>(mg of lung)               | GM in BALF<br>(COI)    | GM in serum<br>(COI)   |
| (Posaconazole)     |   |                                            |                                   |                        |                        |
| Vehicle + Conidia  | 5 | None                                       | 21.0 $\pm$ 7.3                    | 3.4 $\pm$ 0.40         | 3.7 $\pm$ 0.4          |
| Early Intervention | 6 | 2.8<br>[0.14]                              | 13.8 $\pm$ 9.7<br>(34)            | 4.4 $\pm$ 0.9<br>(-29) | 3.0 $\pm$ 0.60<br>(19) |
|                    | 6 | 14<br>[0.70]                               | 9.5 $\pm$ 6.3<br>(55)             | 3.5 $\pm$ 1.4<br>(-3)  | 2.0 $\pm$ 1.3<br>(46)  |
|                    | 6 | 70<br>[3.5]                                | 1.6 $\pm$ 0.9<br>(92)             | 0.6 $\pm$ 0.3<br>(82)  | 0.3 $\pm$ 0.2<br>(92)  |
| (Posaconazole)     |   |                                            |                                   |                        |                        |
| Vehicle + Conidia  | 5 | None                                       | 18.7 $\pm$ 15.2                   | 3.7 $\pm$ 1.1          | 3.6 $\pm$ 1.1          |
| Late Intervention  | 6 | 14<br>[0.70]                               | 9.2 $\pm$ 12.9<br>(51)            | 2.6 $\pm$ 0.5<br>(30)  | 2.7 $\pm$ 0.7<br>(25)  |
|                    | 6 | 70<br>[3.5]                                | 1.5 $\pm$ 1.0<br>(83)             | 0.6 $\pm$ 0.4<br>(84)  | 0.4 $\pm$ 0.2<br>(89)  |
|                    | 6 | 350<br>[17.5]                              | 0.4 $\pm$ 0.3<br>(98)             | 0.2 $\pm$ 0.1<br>(95)  | 0.1 $\pm$ 0.0<br>(97)  |
| (Voriconazole)     |   |                                            |                                   |                        |                        |
| Vehicle + Conidia  | 5 | None                                       | 23.9 $\pm$ 10.5                   | 5.9 $\pm$ 0.1          | 4.7 $\pm$ 0.9          |
| Early Intervention | 6 | 70<br>[3.5]                                | 20.6 $\pm$ 8.3<br>(14)            | 4.5 $\pm$ 1.6<br>(24)  | 2.2 $\pm$ 1.3<br>(53)  |
|                    | 6 | 350<br>[17.5]                              | 9.7 $\pm$ 1.1<br>(59)             | 3.2 $\pm$ 1.3<br>(46)  | 2.3 $\pm$ 1.2<br>(51)  |
|                    | 6 | 1050<br>[52.5]                             | 4.9 $\pm$ 1.9<br>(79)             | 1.0 $\pm$ 0.4<br>(83)  | 0.5 $\pm$ 0.2<br>(89)  |

BALF=bronchoalveolar lavage fluid; CFU=colony forming units; COI: cut-off index which was calculated by the formula: Cut-off index=OD in sample / OD in cut-off control provided in kit; GM=galactomannan; N=number.

Data for fungal load and GM are shown as the mean  $\pm$  standard error (SD); N=5–6.

Percentage inhibition with respect to vehicle (shown in brackets).

# Supplement Figure 1

A

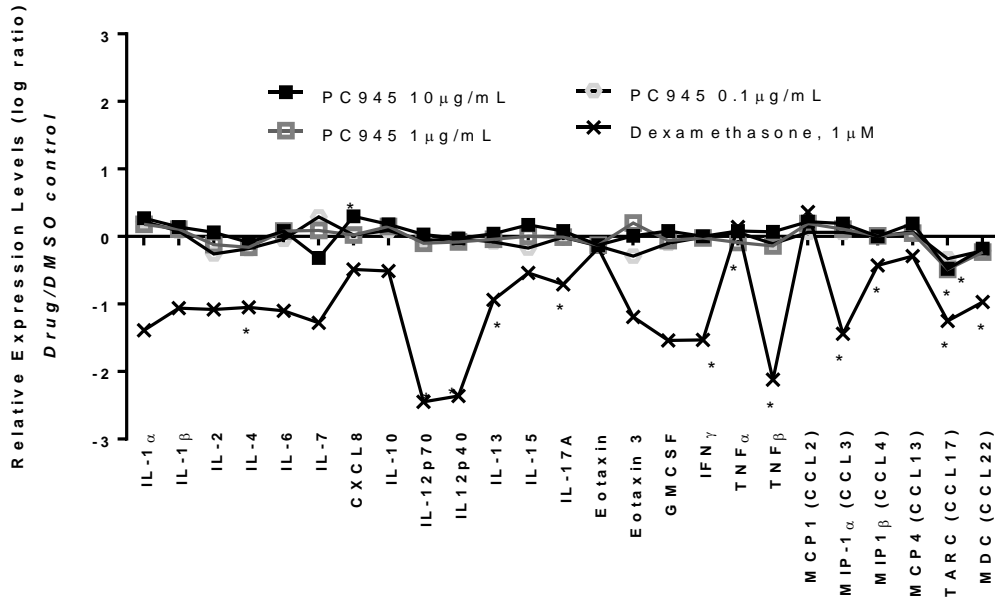

B

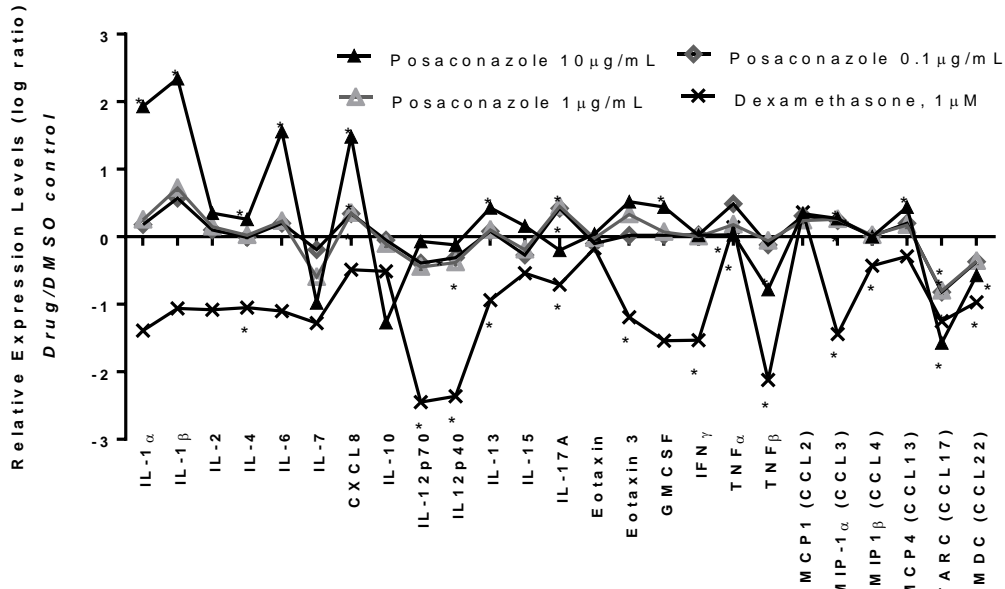

Relative cytokine concentrations in culture supernatant from PBMCs obtained from a healthy subject and stimulated with CytoMix. PC945 or dexamethasone were treated 2hrs before CytoStim stimulation and samples were collected 24hrs post stimulation. Cytokine levels were determined using MSD V-PLEX Plus Human Cytokine 30-Plex Kit and plotted as the value was expressed as log, ratio of the level of cytokines in the presence of drug with that in DMSO control, \* $p < 0.001$ .
